# 1 PhysiCOOL: 2 A generalized framework for model 3 Calibration and Optimization Of 4 modeLing projects

5 Inês G. Gonçalves <sup>1</sup>✉, David A. Hormuth II <sup>2</sup>, Sandhya Prabhakaran <sup>3</sup>, Caleb M.  
6 Phillips <sup>2</sup>, José Manuel García-Aznar <sup>1</sup>

7 <sup>1</sup>Multiscale in Mechanical and Biological Engineering, University of Zaragoza; <sup>2</sup>Oden  
8 Institute for Computational Engineering and Sciences, The University of Texas at Austin;  
9 <sup>3</sup>Integrated Mathematical Oncology department, H.Lee Moffitt Cancer Center and  
10 Research Institute

✉ For correspondence:

<https://github.com/IGGoncalves/PhysiCOOL/issues> (IGG)

**Data availability:** PhysiCOOL is available as a Python library distributed through PyPi. The source code is available on [GitHub](https://github.com). All the examples presented here can be run on [Gitpod](https://github.com) through interactive Jupyter Notebooks. Documentation is available on [ReadTheDocs](https://github.com).

**Funding:** This work was supported as part of the 2021 PhysiCell Hackathon (administrative supplement to Multiscale systems biology modeling to exploit tumor-stromal metabolic crosstalk in colorectal cancer, grant no 1U01CA232137). IGG was and JMGA were supported as part of projects that have received funding from the European Research Council (ERC) under the European Union's Horizon 2020 research and innovation programme (grant agreement no 101018587) and the project PRIMAGE (PRedictive In-silico Multiscale Analytics to support cancer personalized diagnosis and prognosis, empowered by imaging biomarkers), a Horizon 2020 | RIA project (Topic SC1-DTH-07-2018), grant agreement no: 826494.

**Competing interests:** The author declare no competing interests.

## 12 Abstract

13 *In silico* models of biological systems are usually very complex and rely on several parameters describing physical and biological properties that require validation. As such, parameter space exploration is an essential component of computational model development to fully characterize and validate simulation results. Experimental data may also be used to constrain parameter space (or enable model calibration) to enhance the biological relevance of model parameters. One widely used computational platform in the mathematical biology community is *PhysiCell* which provides a standardized approach to agent-based models of biological phenomena at different time and spatial scales. Nonetheless, one limitation of *PhysiCell* is that there has not been a generalized approach for parameter space exploration and calibration that can be run without high-performance computing access. Taking this into account, we present *PhysiCOOL*, an open-source Python library tailored to create standardized calibration and optimization routines of *PhysiCell* models.

## 24 Graphical abstract

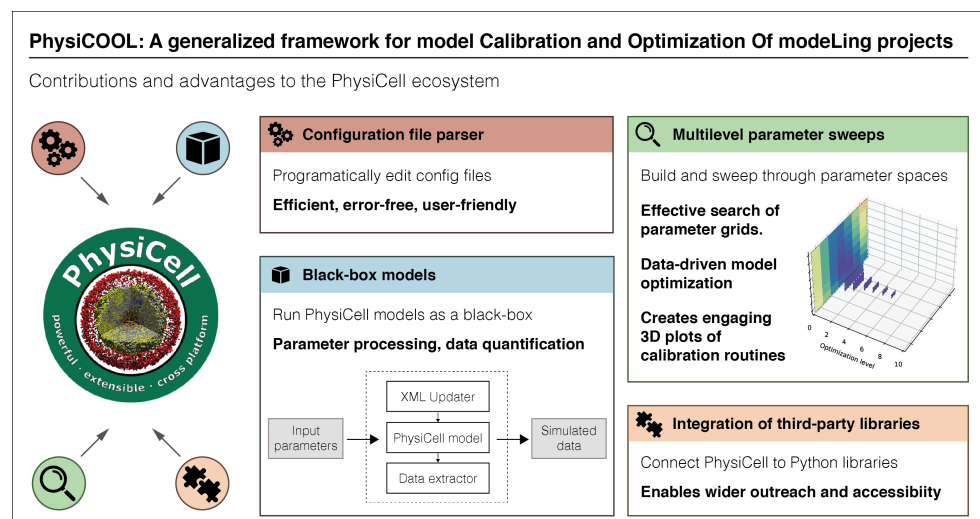

25

## 26 Introduction

27 Mathematical biology is a field of study that aims to represent biological systems through the lan-  
28 guage of mathematics as a set of mathematical rules which can be used to test hypotheses and  
29 make predictions (Clermont and Zenker, 2015). Several types of mathematical models can be em-  
30 ployed to simulate biological systems at varying complexity levels. Agent-based models are one of  
31 the most popular implementations to develop models that consider the cellular and sub-cellular  
32 scales. Currently, multiple computational frameworks are available to facilitate the creation of  
33 agent-based models based on previously built templates, making mathematical biology more ac-  
34 cessible to researchers from different backgrounds (Metzcar et al., 2019). Among these platforms,  
35 *PhysiCell* (Ghaffarizadeh et al., 2018) is an open-source hybrid framework that is able to simulate  
36 cells as discrete agents and model the reaction-diffusion dynamics of the substances present in  
37 the surrounding microenvironment through a continuous approach. Furthermore, recent add-ons  
38 have been developed to introduce new biological processes into the *PhysiCell* ecosystem (Letort et  
39 al., 2018; Bergman et al., 2022; Gonçalves and Garcia-Aznar, 2021).

40 Despite the recent advances in the development of additional *PhysiCell* plugins, the new mod-  
41 ules are mostly centred around model extensions. Nevertheless, model exploration can be as  
42 important as model development to validate results and evaluate whether the model predictions  
43 about the underlying biological mechanisms are plausible (Hasenauer et al., 2015). Furthermore,  
44 experimental data could be used to provide biological and/or physical constraints on model param-  
45 eters to validate whether the model captures the range of expected biological behaviours (Kaze-  
46 rouni et al., 2020), and optimization routines could be employed to understand which model pa-  
47 rameters maximize the similarity between the model results and a target data set. Subsequently,  
48 model developers may consider these optimal solutions to identify which biological mechanisms  
49 captured by the computational model may explain the experimental data.

50 We highlight that previous works have developed parameter exploration routines with *Physi-*  
51 *Cell*, namely DAPT and PhysiCell-EMEWS (Duggan, Metzcar, and Macklin, 2021; Ozik et al., 2018),  
52 but these were specifically designed for high-performance computing (HPC) and distributed sys-  
53 tems. Hence, currently, general *PhysiCell* users without access to such resources, or whose needs  
54 do not require them, must develop their own scripts to process simulation results and perform  
55 model exploration studies. As well as introducing a barrier to scientific progress depending on  
56 the researchers' programming knowledge level and computing resources, HPC workflows, in gen-  
57 eral, lack standardization that may enable widespread use in the mathematical biology community  
58 (Banga, 2008). In addition, DAPT and PhysiCell-EMEWS focus on parameter exploration and not op-  
59 timization, and they require some level of expertise in both Python and PhysiCell.

60 Taking into account that there is still a need in the *PhysiCell* community for a standardized tool  
61 that implements calibration and optimization routines, we present *PhysiCOOL*, a generalized frame-  
62 work for model calibration and optimization of modelling projects written in *PhysiCell*. *PhysiCOOL*  
63 aims to be model agnostic. In other words, models are treated as a black box that can be executed  
64 through Python, making this approach suitable for several kinds of biological problems. Moreover,  
65 our library includes a built-in multilevel optimization routine for parameter estimation that is con-  
66 strained by target output (experimental or otherwise). We also provide two practical examples of  
67 how *PhysiCOOL* can be used, showcasing *PhysiCOOL*'s optimization routine at two distinct complex-  
68 ity levels. Furthermore, we show how *PhysiCOOL* black-box models can be used to couple *PhysiCell*  
69 with other publicly-available Python libraries for model optimization.

## 70 Implementation

71 *PhysiCOOL* is a Python library that requires Python version 3.8 or higher. This package was created  
72 to work specifically with *PhysiCell* models, and it fully supports *PhysiCell* v1.10.4 or lower (the most

73 recent version at the time of publication). Furthermore, *PhysiCOOL* has been tested extensively and  
74 includes unit tests to assure that its modules are working as expected and that it can be used on  
75 different platforms.

## 76 Configuration file parser

77 As with many several computational modelling frameworks, *PhysiCell* models are initialized with  
78 values stored in a text-based configuration file, namely an Extensible Markup Language (XML) file  
79 (Ghaffarizadeh et al., 2018). Thus, in parameter sweeps and sensitivity analysis studies, it is neces-  
80 sary to open these files and modify the parameter values to be studied every time a new simulation  
81 is run. This process can be done manually, either by editing the XML file directly or using GUI tools  
82 such as *xml2jupyter* (Heiland et al., 2019). However, it becomes unfeasible to repeat this action  
83 several times in large-scale studies. Henceforth, it is crucial to automate this process to run opti-  
84 mization and calibration workflows. Although it is possible to create Python scripts that will edit  
85 these files automatically with a standard module such as *ElementTree* (*Xml.etree.ElementTree - the*  
86 *elementtree XML API* n.d.), doing so requires users to identify the values to be updated with long  
87 strings that reflect the structure of the XML file, as shown in the code snippet below.

```
from xml.etree import ElementTree

# Read cell data
file_path = "config/PhysiCell_settings.xml"
tree = ElementTree.parse(file_path)

# Define where to find the motility parameters
stem = "cell_definitions/cell_definition[@name='default']/phenotype/motility"
# Define the name and value of the parameter to be updated
key = "migration_bias"
value = 0.9
# Update the migration_bias value (no validation)
tree.find(f"{stem}/{key}").text = str(value)
tree.write(file_path)
```

88 Here, we aimed to develop a Python class that enables users to read the data from these configu-  
89 ration files in a more efficient manner, making this process less prone to errors. We implemented  
90 a *ConfigurationFileParser* class that reads the data from the configuration file into custom Python  
91 objects that follow the expected structure and data requirements defined in the XML file. Vari-  
92 able types and numerical constraints are validated when new instances of these data classes are  
93 created and when their values are updated. To achieve this, we implemented our classes using  
94 *Pydantic*, (Colvin, n.d.) which improves data validation in Python. The task described in the code  
95 snippet presented previously can be implemented in a more user-friendly way with *PhysiCOOL*, as  
96 shown below:

```
from physicool.config import ConfigFileParser

# Read cell data into custom Python objects
file_path = "config/PhysiCell_settings.xml"
parser = ConfigFileParser(file_path)
cell_data = parser.read_cell_data(name="default")

# Update the migration_bias value (values will be validated before writing)
cell_data.motility.migration_bias = 0.9
```

```
parser.write_cell_params(cell_data)
```

## 97 **Black-box models**

98 In complex and large computational models, it may be challenging or even impossible to estimate  
99 the model outputs analytically. Consequently, it is common to conduct calibration and optimization  
100 studies by running several simulations and performing sensitivity analysis studies to identify how  
101 model outputs change in response to different input parameter values. This process is recognized  
102 as simulation-based optimization or black-box optimization (Alarie et al., 2021). *PhysiCell* models  
103 are written in C++ and have to be compiled to produce an executable file that can be run to produce  
104 simulation results. In order to test and characterize the response of these models, it is generally  
105 necessary to conduct three tasks:

- 106 1. Update the *PhysiCell* configuration file with input parameters values;
- 107 2. Run the *PhysiCell* model;
- 108 3. Read the model outputs and compute a desired output metric.

109 These tasks can be performed manually. Nonetheless, it is not feasible or productive to do so in  
110 large computational studies, specifically when trying to characterize the model response to a large  
111 number of input parameter values that can be inside a wide range and require multiple simulation  
112 runs. Hence, PhysiCOOL allows users to create black-box models using the *PhysiCellBlackBox* class  
113 and automatically perform the aforementioned tasks through Python.

114 These black-box models are modular in the sense that the users can select what functions to use  
115 to update the configuration file (i) and to process the results (iii). For instance, users can decide to  
116 change the cells' motility parameters and evaluate the effect on the distance travelled by cells over  
117 time. Alternatively, the cell cycling rates could be varied to analyze the evolution of the number of  
118 cells. Furthermore, (i) and (iii) do not have to be defined in the black-box model. In fact, users can  
119 also create black-box models composed only of the *PhysiCell* executable and use our approach to  
120 run multiple simulation replicates.

121 PhysiCOOL offers some built-in data quantification methods that can be used to extract and  
122 process data in step (iii). For example, functions are provided to obtain the final number of cells  
123 in a simulation, the final cell coordinates and the concentration of a given substance over the  
124 simulation domain. Furthermore, these methods can be employed by users to process simulation  
125 results and generate 2D and 3D plots of the cells and the microenvironment.

## 126 **Multilevel parameter sweeps**

127 Parameter optimization studies require the definition of a search space, which defines the range of  
128 the parameter values that will be studied. There are multiple approaches to defining this space and  
129 how to explore it. For example, random search algorithms can be employed to randomly sample  
130 points within a defined bounded parameter space. Alternatively, a grid search, while a more com-  
131 putationally expensive option, systematically samples every point within a defined parameter grid  
132 space providing a more comprehensive overview of the model's response than that offered by a  
133 random search. Grid-based approaches have advantages for stochastic frameworks such as Physi-  
134 Cell, as gradient-based approaches may struggle to accurately calculate the gradient and change  
135 the parameter set to minimize the error between the model and the target data.

136 PhysiCOOL implements a multilevel parameter sweep class (*MultiLevelSweep*) that is aimed at  
137 identifying the parameters that best fit a target data set through a grid search. In this example,  
138 the parameter sweep considers two *PhysiCell* parameters for which the user should provide initial  
139 values. At each level, *MultiLevelSweep* creates a search grid based on these two values, the number  
140 of points per direction and the percentage per direction. These values should be configured by  
141 the user and optimized for a given problem. Furthermore, the number of levels and grid spacing  
142 parameters are related to the precision and sensitivity of each model parameter. That is, for less

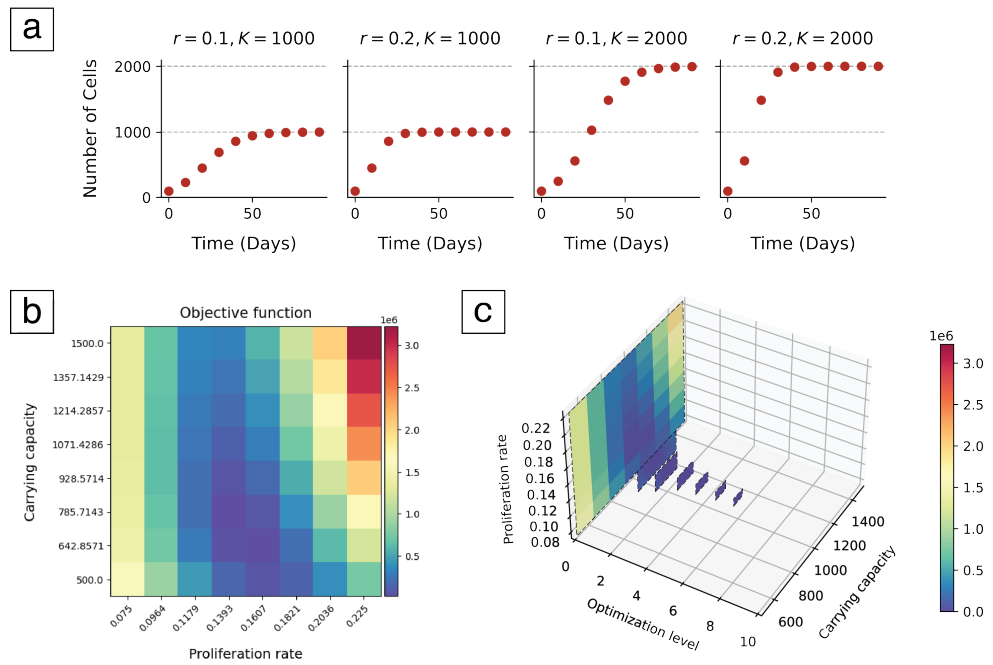

**Figure 1.** Model and optimization results for the logistic growth example. (a) Growth curves obtained for different parameter sets (carrying capacity,  $K$ , and proliferation rate,  $r$ ). (b) Optimization results after the completion of the first level of the multilevel optimization algorithm. The heatmap shows the difference, as given by the summed squared error, between the target data and the data produced by each cell's input parameters. (c) Optimization results after 7 levels of the multilevel optimization algorithm. Results converged to the parameters that originated the target data.

143 sensitivity or less precise models, a single-level coarse grid search may suffice. However, for param-  
 144 eters that require a high level of precision and significantly affect the model outcomes, multiple  
 145 levels may be beneficial.

146 The results for each simulation are compared to the target data and the error between both  
 147 datasets is computed and stored. At the end of the level, the parameters that provided the min-  
 148 imum error value are selected as the centre of the parameter exploration grid for the next level  
 149 and the parameter bounds are updated accordingly.

## 150 Examples

### 151 Simple model of logistic growth

152 The first example was implemented to calibrate two parameters of a simple model of logistic  
 153 growth based on some target data that defines a generated growth curve. Therefore, it serves  
 154 as an introduction to this *PhysiCOOL* feature, as users are able to fully understand the behaviour of  
 155 this simple model. It must be remarked that this model was not implemented in *PhysiCell*. We mod-  
 156 elled the number of agents in a population,  $N$ , over a period of time  $t$  through a logistic function  
 157 given by Eq 1:

$$N(t) = \frac{KN_0}{N_0 + (K - N_0)\exp(-rt)} \quad (1)$$

158 where  $K$  represents the carrying capacity, i.e., the maximum population size,  $N_0$  represents the  
 159 number of initial agents and  $r$  is the proliferation rate. In this study, we fixed the initial number  
 160 of agents and evaluated how the carrying capacity and the proliferation rate regulated the growth  
 161 curve of a population. An example of two growth curves obtained for different model parameters  
 162 is shown in Fig 1(a).

**Table 1.** Parameter values used in the multilevel optimization examples.

| Example         | Initial point  | Points | %    | Levels | Estimated point | Target point   |
|-----------------|----------------|--------|------|--------|-----------------|----------------|
| Logistic growth | (0.15, 1000.0) | 8      | 50 % | 7      | (0.10, 994.7)   | (0.10, 1000.0) |
| Chemotaxis      | (2.5, 0.7)     | 5      | 30 % | 4      | (1.7, 0.8)      | (2.0, 0.9)     |

163 We generated some target data using this model ( $K = 1000$ ,  $r = 0.1$ ) and, subsequently, we used  
164 *PhysiCOOL*'s multilevel sweep algorithm to evaluate if we could estimate these model parameters  
165 based on their resulting growth curve. To do so, we first created a search grid based on a set of  
166 user-defined values: an initial estimate for both parameters, the number of points to search in  
167 each direction of the search grid, the percentage to vary in each direction and the number of levels  
168 to search. These values can be found in Table 1.

169 Fig 1(b) shows the error between the target and simulated datasets for every cell of the parame-  
170 ter space after one level of the multilevel search. At this point, a new point estimate was calculated  
171 based on the parameter values that minimized the error between the two datasets. Likewise, the  
172 parameter space was adjusted to the area of interest and the process was repeated in the new  
173 parameter grid. This process was repeated for each level of the search and the results are shown  
174 in Fig 1(c).

### 175 **PhysiCell chemotaxis model**

176 The second example can be classified as a more complex problem since it was developed to cali-  
177 brate a chemotaxis model written in *PhysiCell*. In this modelling framework, the cells' chemotactic  
178 response, i.e., the ability to migrate along a substance gradient, is dictated by a bias value defined  
179 between 0 and 1 (Ghaffarizadeh et al., 2018). When cells have a migration bias of 0, they move in a  
180 random walk. Conversely, if the value is set to 1, cells follow the substance gradient in a determin-  
181 istic manner. Therefore, we developed a model to estimate the cells' speed and migration bias in  
182 response to an oxygen gradient based on their travelled distances.

183 We implemented a 2D simulation with an oxygen source on one of the domain walls, as defined  
184 by the model's boundary conditions, and a group of cells placed on the opposite wall, as shown in  
185 Fig 2(a). We expected that the cells' final position would be modulated by the cells' sensitivity to the  
186 oxygen chemotactic gradient. On the one hand, if a cell population had low sensitivity and, thus,  
187 moved randomly, they would likely remain close to their initial position as they would move around  
188 without following any specific direction. On the other hand, cells that followed oxygen would move  
189 towards the opposite wall, as seen in panel 2(b).

190 We generated some target data by running a simulation with a migration bias of 0.9 and a  
191 speed value of  $2.0 \mu\text{m}/\text{min}$  and storing the final y coordinates of the cells. Subsequently, we ran  
192 our multilevel sweep pipeline to evaluate whether we could estimate the parameter values that  
193 originated this data with a set of initial points different from the target parameter values. The  
194 results for this study are shown in Fig 2(c).

### 195 **Connecting to third-party libraries**

196 Given that *PhysiCOOL* makes it possible for users to turn their *PhysiCell* models into black-box mod-  
197 els that receive some input parameters and return an output metric, it is straightforward to cou-  
198 ple them with third-party Python libraries that accept this kind of models. For example, *psweep*  
199 (Schmerler, 2022) is a Python library developed to run parameter studies and save the input pa-  
200 rameters values and the returned output metrics into a database. Users must define a set of pa-  
201 rameters and, for each of the defined values, *psweep* will (i) run a given user-defined function that  
202 takes these parameters as input and (ii) save the input and output values returned by this function  
203 into the database. Therefore, a *PhysiCOOL* black-box model could seamlessly be integrated into  
204 step (i).



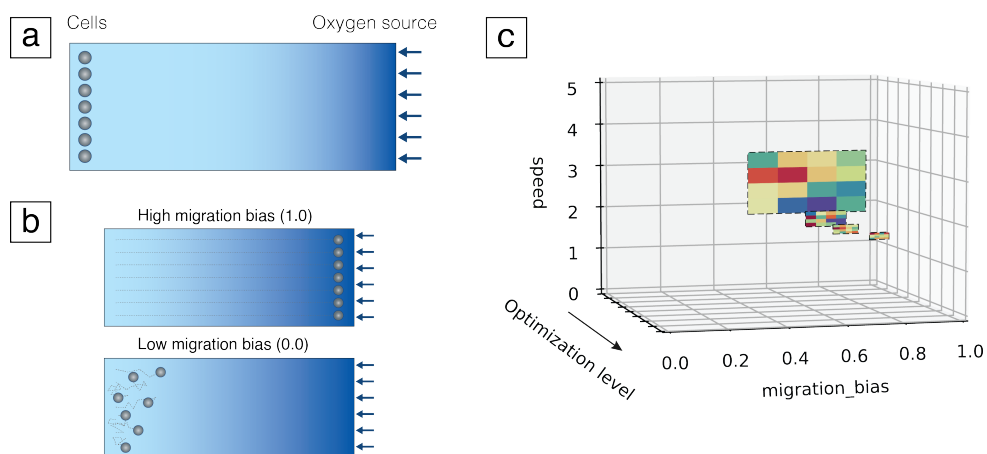

**Figure 2.** Model and optimization results for the chemotaxis example. (a) Initial model configuration design. Cells (represented as grey circles) were placed close to a domain wall and an oxygen source (represented by the blue arrows) was simulated on the opposite wall, creating a chemotactic gradient that cells could follow. This gradient is illustrated by the colour gradient shown in the figure. (b) Expected model results for cells with different migration bias values. High migration bias populations were expected to migrate in a deterministic manner and follow the oxygen gradient, crossing the domain and arriving at the opposite wall, as shown by their trajectories, shown as grey dashed lines. On the other hand, cells with low migration bias were expected to move randomly and, thus, present low net displacement values. (c) Optimization results after 4 levels of the multilevel optimization algorithm. Results converged to the parameters that originated the target data. The colormap was updated for each level, describing the minimum and maximum error values at the current level.

205 In addition, more sophisticated libraries could be considered to perform advanced optimization  
206 studies such as Approximate Bayesian Computation (ABC) and Bayesian Optimization for  
207 Likelihood-Free Inference (BOLFI) to sample parameter spaces in a more efficient manner (Lin-  
208 tusaari et al., 2018; Merino-Casallo et al., 2018; Lei et al., 2021; Movilla et al., 2023). Henceforth,  
209 although *PhysiCOOL* offers built-in optimization routines, it can be used in a modular way to take  
210 advantage of other libraries that may be more appropriate to a certain study or type of research,  
211 without the need to implement these optimization algorithms from scratch.

## 212 Future directions

213 At its current state of development, we believe that *PhysiCOOL* will already improve *PhysiCell's* acces-  
214 sibility as it provides an intuitive interface to run studies in Python, which is more popular among  
215 biology researchers than C++, in which *PhysiCell* was originally written. Additionally, this standard-  
216 ized approach provides a straightforward workflow for integrating target data (defined from sim-  
217 ulations or biological observations) to constrain parameter space for agent-based models. In the  
218 future, new features can be added to *PhysiCOOL*, such as the ability to generate non-linear param-  
219 eter spaces, stopping criteria based on iteration or tolerance for the multilevel sweep and employing  
220 alternative optimization algorithms. Although future iterations of this library may include different  
221 optimization approaches, its modular design assures that advanced users are still able to build  
222 pipelines that suit their needs.

## 223 Acknowledgment

224 The authors would like to acknowledge Paul Macklin, Elmar Bucher and the *PhysiCell* team for the  
225 support and advice offered during the design process of this application. This preprint was created  
226 using the LaPreprint template (<https://github.com/roaldarbol/lapreprint>) by Mikkel Roald-Arbøl .

## 227 Author contributions

- 228 • **Conceptualization:** Inês G. Gonçalves, David A. Hormuth II, Caleb M. Phillips, Sandhya Prabhakaran
- 229       hakaran
- 230 • **Software:** Inês G. Gonçalves, David A. Hormuth II, Caleb M. Phillips
- 231 • **Validation:** Inês G. Gonçalves, David A. Hormuth II, Sandhya Prabhakaran
- 232 • **Writing - original draft:** Inês G. Gonçalves
- 233 • **Writing - review & editing:** Inês G. Gonçalves, David A. Hormuth II, Sandhya Prabhakaran, José
- 234       Manuel García-Aznar
- 235 • **Funding acquisition:** José Manuel García-Aznar

## 236 References

- 237 Alarie, Stéphane et al. (2021). "Two decades of blackbox optimization applications". en. In: *EURO j.*
- 238       *comput. optim.* 9.100011, p. 100011.
- 239 Banga, Julio R (2008). "Optimization in computational systems biology". In: *BMC Systems Biology* 2.1.
- 240       DOI: [10.1186/1752-0509-2-47](https://doi.org/10.1186/1752-0509-2-47). URL: <https://doi.org/10.1186%2F1752-0509-2-47>.
- 241 Bergman, Daniel et al. (2022). "PhysiPKPD: A pharmacokinetics and pharmacodynamics module
- 242       for PhysiCell". In: *Gigabyte* 2022, pp. 1–11. DOI: [10.46471/gigabyte.72](https://doi.org/10.46471/gigabyte.72). URL: [https://doi.org/10.](https://doi.org/10.46471/gigabyte.72)
- 243       [46471/gigabyte.72](https://doi.org/10.46471/gigabyte.72).
- 244 Clermont, Gilles and Sven Zenker (2015). "The inverse problem in mathematical biology". In: *Math-*
- 245       *ematical Biosciences* 260, pp. 11–15. DOI: [10.1016/j.mbs.2014.09.001](https://doi.org/10.1016/j.mbs.2014.09.001). URL: [https://doi.org/10.](https://doi.org/10.1016%2Fj.mbs.2014.09.001)
- 246       [1016%2Fj.mbs.2014.09.001](https://doi.org/10.1016%2Fj.mbs.2014.09.001).
- 247 Colvin, Samuel (n.d.). *Samuelcolvin/pydantic: Data Parsing and validation using python type hints*. URL:
- 248       <https://github.com/samuelcolvin/pydantic>.
- 249 Duggan, Ben, John Metzcar, and Paul Macklin (2021). "DAPT: A package enabling distributed auto-
- 250       mated parameter testing". In: *Gigabyte* 2021, pp. 1–10. DOI: [10.46471/gigabyte.22](https://doi.org/10.46471/gigabyte.22). URL: <https://doi.org/10.46471%2Fgigabyte.22>.
- 251       [//doi.org/10.46471%2Fgigabyte.22](https://doi.org/10.46471%2Fgigabyte.22).
- 252 Ghaffarizadeh, Ahmadreza et al. (2018). "PhysiCell: An open source physics-based cell simulator
- 253       for 3-D multicellular systems". In: *PLOS Computational Biology* 14 (2). Ed. by Timothée Poisot,
- 254       e1005991. ISSN: 1553-7358. DOI: [10.1371/journal.pcbi.1005991](https://doi.org/10.1371/journal.pcbi.1005991). URL: [https://dx.plos.org/10.1371/](https://dx.plos.org/10.1371/journal.pcbi.1005991)
- 255       [journal.pcbi.1005991](https://dx.plos.org/10.1371/journal.pcbi.1005991).
- 256 Gonçalves, Inês G and Jose Manuel Garcia-Aznar (2021). "Extracellular matrix density regulates
- 257       the formation of tumour spheroids through cell migration". In: *PLoS computational biology* 17.2,
- 258       e1008764.
- 259 Hasenauer, Jan et al. (2015). "Data-Driven Modelling of Biological Multi-Scale Processes". In: *Journal*
- 260       *of Coupled Systems and Multiscale Dynamics* 3.2, pp. 101–121. DOI: [10.1166/jcsmd.2015.1069](https://doi.org/10.1166/jcsmd.2015.1069). URL:
- 261       <https://doi.org/10.1166%2Fjcsmd.2015.1069>.
- 262 Heiland, Randy et al. (2019). "xml2jupyter: Mapping parameters between XML and Jupyter widgets".
- 263       In: *Journal of Open Source Software* 4 (39), p. 1408. ISSN: 2475-9066. DOI: [10.21105/joss.01408](https://doi.org/10.21105/joss.01408).
- 264 Kazerouni, Anum S. et al. (2020). "Integrating Quantitative Assays with Biologically Based Mathe-
- 265       matical Modeling for Predictive Oncology". In: *iScience* 23.12, p. 101807. ISSN: 2589-0042. DOI:
- 266       <https://doi.org/10.1016/j.isci.2020.101807>. URL: [https://www.sciencedirect.com/science/article/pii/](https://www.sciencedirect.com/science/article/pii/S258900422031004X)
- 267       [S258900422031004X](https://www.sciencedirect.com/science/article/pii/S258900422031004X).
- 268 Lei, Bowen et al. (2021). "Bayesian optimization with adaptive surrogate models for automated
- 269       experimental design". In: *Npj Computational Materials* 7.1, p. 194.
- 270 Letort, Gaelle et al. (2018). "PhysiBoSS: a multi-scale agent-based modelling framework integrating
- 271       physical dimension and cell signalling". In: *Bioinformatics* 35.7. Ed. by Jonathan Wren, pp. 1188–
- 272       1196. DOI: [10.1093/bioinformatics/bty766](https://doi.org/10.1093/bioinformatics/bty766). URL: <https://doi.org/10.1093%2Fbioinformatics%2Fbty766>.
- 273 Lintusaari, Jarno et al. (2018). "ELFI: Engine for Likelihood-Free Inference". In: *Journal of Machine*
- 274       *Learning Research* 19.16, pp. 1–7. URL: <http://jmlr.org/papers/v19/17-374.html>.



- 275 Merino-Casallo, Francisco et al. (2018). "Integration of in vitro and in silico models using Bayesian  
276 optimization with an application to stochastic modeling of mesenchymal 3D cell migration". In:  
277 *Frontiers in physiology* 9, p. 1246.
- 278 Metzcar, John et al. (2019). "A Review of Cell-Based Computational Modeling in Cancer Biology". In:  
279 *JCO Clinical Cancer Informatics* 3, pp. 1–13. DOI: [10.1200/Jco.2019.00069](https://doi.org/10.1200/Jco.2019.00069). URL: <https://doi.org/10.1200/Jco.2019.00069>.
- 280
- 281 Movilla, Nieves et al. (2023). "A novel integrated experimental and computational approach to un-  
282 ravel fibroblast motility in response to chemical gradients in 3D collagen matrices". In: *Integra-*  
283 *tive Biology*. DOI: [10.1093/intbio/zyad002](https://doi.org/10.1093/intbio/zyad002). URL: <https://doi.org/10.1093/intbio/zyad002>.
- 284 Ozik, Jonathan et al. (2018). "High-throughput cancer hypothesis testing with an integrated PhysiCell-  
285 EMEWS workflow". In: *BMC Bioinformatics* 19.S18. DOI: [10.1186/s12859-018-2510-x](https://doi.org/10.1186/s12859-018-2510-x). URL: <https://doi.org/10.1186/s12859-018-2510-x>.
- 286
- 287 Schmerler, Steve (2022). *elcorto/psweep: 0.9.0*. Version 0.9.0. DOI: [10.5281/zenodo.7076330](https://doi.org/10.5281/zenodo.7076330). URL:  
288 <https://doi.org/10.5281/zenodo.7076330>.
- 289 *Xml.etree.ElementTree - the elementtree XML API* (n.d.). URL: [https://docs.python.org/3/library/xml.etree.](https://docs.python.org/3/library/xml.etree.elementtree.html)  
290 [elementtree.html](https://docs.python.org/3/library/xml.etree.elementtree.html).
